# Supplementary material
Source: Springer Nature journal article supplement (https://www.springermedizin.de/resource/supplementary/12889_2013_6987_MOESM5_ESM.pdf/9499546)

Community

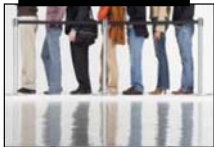

Many came and  
9,862 got  
circumcised

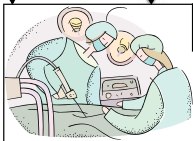

VMMC Clinic

8,306 (84%) returned for  
follow up

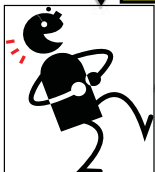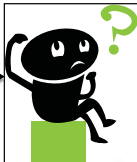

Many  
had  
concerns  
some  
called  
the EPR  
some  
returned  
to clinic

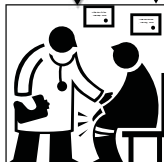

341 clients with AEs  
by clinicians

12,492 and 3,654 calls asking for  
counseling about VMMC and general  
information respectively

EPR

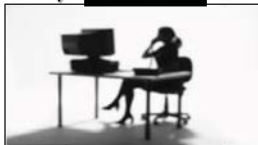

Received a  
total of  
17,059 calls

384 Clients  
diagnosed with 420  
AE by the EPR:  
240 referred to clinic. The rest  
managed on the  
phone

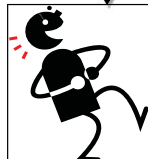

Supplement: MOESM5 [file 9499546]
